# Supplementary material for: Ligation of MHC Class II Induces PKC-Dependent Clathrin-Mediated Endocytosis of MHC Class II
Source: PubMed Central journal article supplement (PMC7465434; doi:10.3390/cells9081810), 2020-07-30
Supplement: cells-09-01810-s001.pdf [file cells-09-01810-s001.pdf]

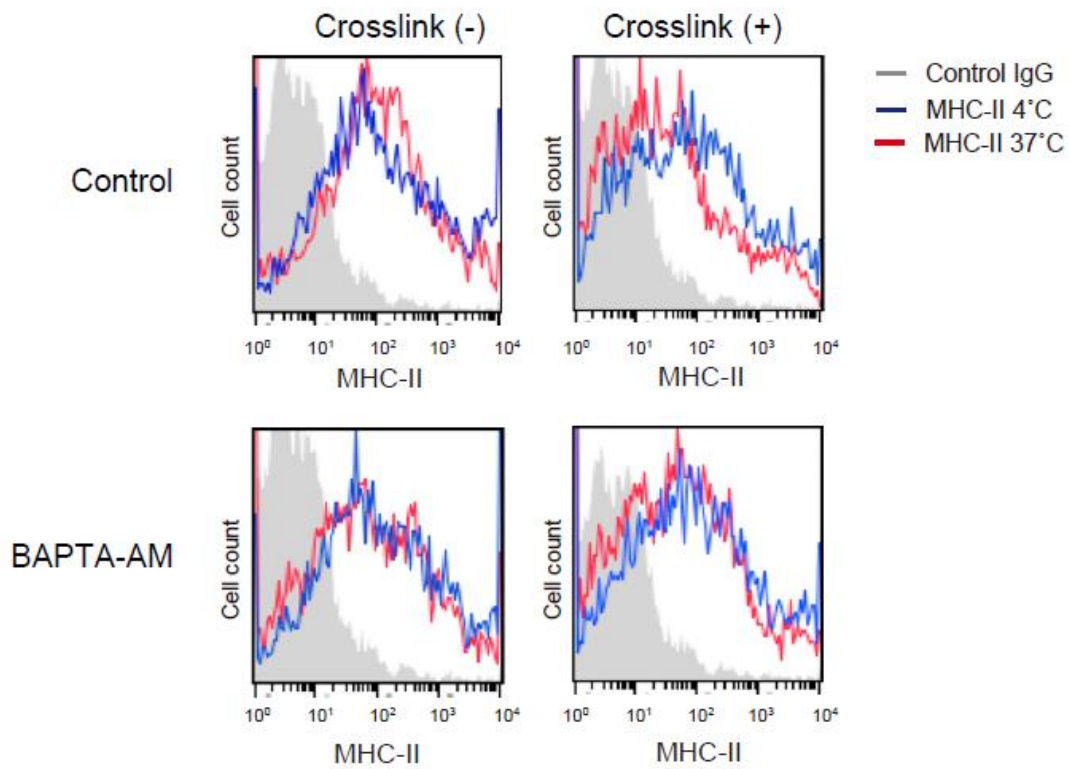

**Figure S1** Effect of crosslinking and BAPTA-AM on endocytosis of MHC-II. BMDCs were pretreated with or without BAPTA-AM (50  $\mu$ M) for 30 min at 37  $^{\circ}$ C. The cells were then incubated with (crosslink (+)) or without (Crosslink (-)) a primary anti-MHC-II antibody for 30 min at 4  $^{\circ}$ C. The cell surface MHC-II antibody was crosslinked with a secondary antibody for 30 min at 37  $^{\circ}$ C (red line) or 4  $^{\circ}$ C (blue line). The remaining cell surface MHC-II antibody was detected by flow cytometry. Gray filled histogram indicates control IgG staining.
